# Supplementary material for: Mechanism study of the photothermal function of lignin: the effect of electron-withdrawing groups
Source: Royal Society of Chemistry journal article supplement (doi:10.1039/d3gc04125e), 2024-01-01
Supplement: d3gc04125e1.pdf [file d3gc04125e1.pdf]

# **Mechanism Study on the Photothermal Function of Lignin: Effect of Electron-Withdrawing Group**

Junjie Lei<sup>1</sup>, Liheng Chen<sup>2</sup>, JinXin Lin<sup>2</sup>, Weifeng Liu<sup>1,\*</sup>, Qingang Xiong,<sup>3</sup> Xueqing Qiu<sup>2,\*</sup>

<sup>1</sup> State Key Laboratory of Pulp and Paper Engineering, School of Chemistry and Chemical Engineering, Guangdong Provincial Key Lab of Green Chemical Product Technology, South China University of Technology, Guangzhou 510640, China

<sup>2</sup> School of Chemical Engineering and Light Industry, Guangdong University of Technology, Guangzhou 510006, China.

<sup>3</sup> State Key Laboratory of Pulp and Paper Engineering, South China University of Technology, Guangzhou 510640, China

Corresponding author.

E-mail: weifengliu@scut.edu.cn (W. Liu); qxq@gdut.edu.cn (X. Qiu)

## Calculation of photothermal efficiency of modified lignin

The detailed calculation method for the photothermal conversion efficiency of lignin was provided in the SI document.<sup>1, 2</sup>

Based on the law of conservation of energy, the input energy of laser irradiation is transformed into heat energy radiated to the environment and energy absorbed by lignin:

$$\sum_i m_i C_{p,i} \frac{dT}{dt} = Q_s - Q_{loss} \quad (1)$$

where  $m_i$  and  $C_{p,i}$  are the mass and specific heat capacity of lignin, respectively,  $Q_s$  is the input energy of laser irradiation, and  $Q_{loss}$  is the heat energy radiated to the environment.

$Q_{loss}$  is calculated as follows:

$$Q_{loss} = hS(T - T_{surr}) = hS\Delta T \quad (2)$$

where  $h$  is the heat transfer coefficient of lignin,  $S$  is the surface area of the test sample irradiated by laser, and  $T_{surr}$  is the ambient temperature.

The system is in equilibrium when the test sample reaches its maximum temperature. At this point, the input energy of the laser irradiation is equal to the thermal energy radiated to the environment:

$$Q_s = Q_{loss} = hS(T_{max} - T_{surr}) = hS\Delta T_{max} \quad (3)$$

Where  $T_{max}$  is the maximum temperature of the system at equilibrium,  $\Delta T_{max}$  is the maximum value of the temperature change when the system reaches equilibrium, and the cooling section curve of the maximum temperature is used to calculate the photothermal conversion efficiency:

Photothermal conversion efficiency  $\eta$  is calculated as follows:

$$\eta = \frac{hS\Delta T_{max}}{I} \quad (4)$$

where  $I$  is the power of laser, which is 0.144 W.

Since the exact value of  $hS$  is difficult to obtain. Therefore, in order to replace  $hS$  for subsequent calculations, a dimensionless driving force temperature  $\theta$  is introduced:

$$\theta = \frac{T - T_{surr}}{T_{max} - T_{surr}} \quad (5)$$

Calculating the differential of the above equation gives:

$$d\theta = \frac{1}{T_{max} - T_{surr}} dT = \frac{1}{\Delta T_{max}} dT \quad (6)$$

Where  $T$  is the test sample temperature (observed using an infrared camera),  $T_{max}$  is the maximum temperature of the system at equilibrium, and  $T_{surr}$  is the ambient temperature. By substituting Eq. 6 into Eq. 1, we get:

$$\frac{d\theta}{dt} = \frac{hS}{\sum_i m_i C_{p,i}} \left( \frac{Q_s}{hS\Delta T_{max}} - \frac{\Delta T}{\Delta T_{max}} \right) = \frac{hS}{\sum_i m_i C_{p,i}} \left( \frac{Q_s}{hS\Delta T_{max}} - \theta \right) \quad (7)$$

Cooling time constant  $\tau_s$  of the test sample is then introduced:

$$\tau_s = \frac{\sum_i m_i C_{p,i}}{hS} \quad (8)$$

Substituting into Eq. 7 and get:

$$\frac{d\theta}{dt} = \frac{1}{\tau_s} \frac{Q_s}{hS\Delta T_{max}} - \frac{\theta}{\tau_s} \quad (9)$$

Switching off the laser irradiation, the input energy of laser to the test material  $Q_s = 0$ , get:

$$\frac{d\theta}{dt} = -\frac{\theta}{\tau_s} \quad (10)$$

$$t = -\tau_s \ln \theta \quad (11)$$

The cooling segment curve of the test sample is selected and plotted with time  $t$  (s) as y-axis and  $\ln \theta$  as x-axis, and the slope of the curve is the cooling time constant  $\tau_s$ .

By combing Eq. 5 and Eq. 9, the calculation formula for the photothermal conversion efficiency is:

$$\eta = \frac{hS\Delta T_{max}}{I} = \frac{\sum_i m_i C_{p,i}}{\tau_s} \times \frac{\Delta T_{max}}{I} \quad (12)$$

The photothermal conversion efficiency of lignin can be calculated by combing the average specific heat capacity of lignin measured by DSC and the mass of the test sample (9 mg).



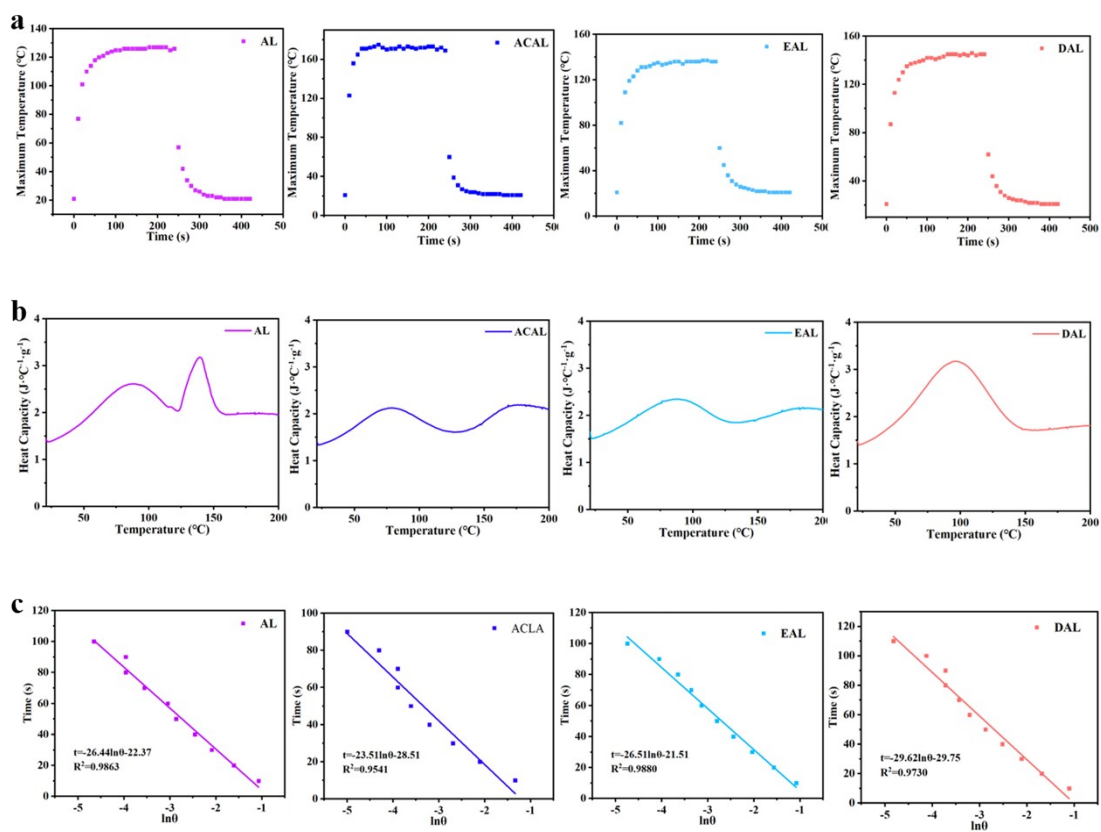

Fig. S1 (a) The heating and cooling cycle of lignin under 808 nm laser irradiation at  $0.51 \text{ W}\cdot\text{cm}^{-2}$  (b) The change of specific heat capacity of lignin from  $20 \text{ }^\circ\text{C}$  to  $200 \text{ }^\circ\text{C}$  with DSC instrument (c) The corresponding time- $\ln\theta$  linear curve of the heating and cooling cycle of lignin.

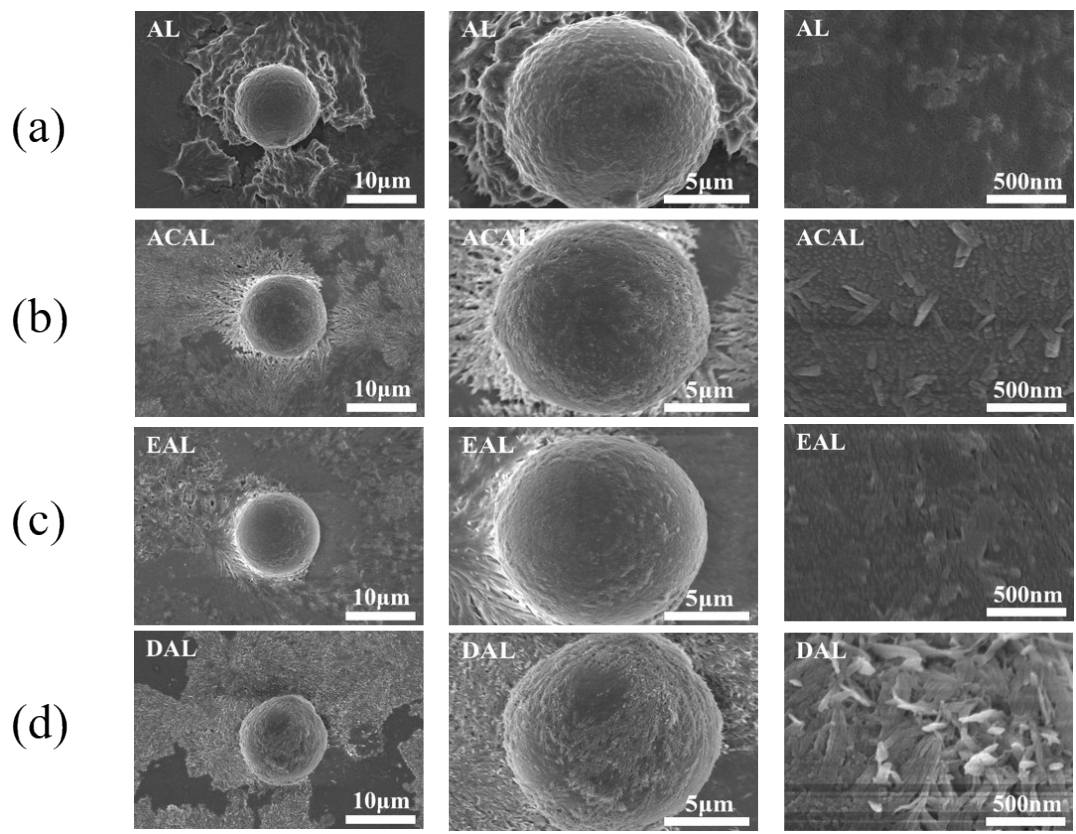

Fig. S2 SEM image of lignin-coated AFM probe.

Table S1 The characteristic parameters of lignin

|                                                                          | <b>AL</b> | <b>ACAL</b> | <b>EAL</b> | <b>DAL</b> |
|--------------------------------------------------------------------------|-----------|-------------|------------|------------|
| Specific heat capacity $C_p$<br>( $J \cdot g^{-1} \cdot ^\circ C^{-1}$ ) | 2.16      | 1.86        | 2.01       | 2.15       |
| Cooling time $\tau_s$ (s)                                                | 26.44     | 23.51       | 26.51      | 29.62      |
| Photothermal conversion<br>efficiency $\eta$ (%)                         | 53.6%     | 73.2%       | 54.5%      | 56.3%      |

Table S2 Summary of photothermal conversion efficiency of organic photothermal materials presented in this work comparing with reported literatures.

| Materials                                                                     | Photothermal              |                    | Power Density<br>(W·cm <sup>-2</sup> ) |
|-------------------------------------------------------------------------------|---------------------------|--------------------|----------------------------------------|
|                                                                               | Conversion Efficiency (%) | Excited Laser (nm) |                                        |
| This work                                                                     | 73.2                      | 808                | 0.51                                   |
| Polydopamine <sup>3</sup>                                                     | 25.6                      | 808                | 2.00                                   |
| Organic molecules with donor-acceptor structures (2TPE-2NDDTA) <sup>4</sup>   | 54.9                      | 808                | 0.80                                   |
| Copolymers with benzothiadiazole-fused acenaphthenequinone imide <sup>5</sup> | 58.2                      | 1064               | 1.00                                   |
| Thiadiazoloquinoxaline-based semi-conducting polymers <sup>6</sup>            | 61.6                      | 1060               | 1.00                                   |
| Quaterrylene diimide nanoparticles <sup>7</sup>                               | 64.7                      | 808                | 1.00                                   |
| Coronene-F4TCNQ cocrystal <sup>8</sup>                                        | 69.3                      | 808                | 0.28                                   |
| BODIPY tetramers <sup>9</sup>                                                 | 72.4                      | 808                | 0.50                                   |
| D- $\pi$ -A- $\pi$ -D typed small molecule (2DMTT-BBTD) <sup>10</sup>         | 74.8                      | 808                | 0.80                                   |
| Croconium derivative <sup>11</sup>                                            | 79.5                      | 808                | 0.80                                   |
| Borondifluoride bridged azafulvene complex <sup>12</sup>                      | 80.0                      | 1064               | 0.75                                   |



# Reference

1. J. Li, W. Liu, X. Qiu, X. Zhao, Z. Chen, M. Yan, Z. Fang, Z. Li, Z. Tu and J. Huang, *Green Chem.*, 2022, 24, 823-836.
2. Z. Tu, J. Wang, W. Liu, Z. Chen, J. Huang, J. Li, H. Lou and X. Qiu, *Mater. Horiz.*, 2022, 9, 2613-2625.
3. Y. Zou, X. Chen, P. Yang, G. Liang, Y. Yang, Z. Gu and Y. Li, *Sci. Adv.*, 2020, 6, eabb4696.
4. Z. Zhao, C. Chen, W. Wu, F. Wang, L. Du, X. Zhang, Y. Xiong, X. He, Y. Cai, R. Kwok, J. Lam, X. Gao, P. Sun, D. Phillips, D. Ding and B. Tang, *Nat. Commun.*, 2019, 10, 768.
5. H. Li, Ha. Li, L. Zou, Q. Li, P. Chen, X. Quan, K. Deng, C. Sheng, J. Ji, Q. Fan, Z. Xu and J. Wan, *J. Mater. Chem. A*, 2023, 11, 2933-2946.
6. M. Zha, X. Lin, J. Ni, Y. Li, Y. Zhang, X. Zhang, L. Wang and K. Li, *Angew. Chem. Int. Ed.*, 2020, 59, 23268.
7. C. Liu, S. Zhang, J. Li, J. Wei, K. Müllen and M. Yin, *Angew. Chem. Int. Ed.*, 2019, 58, 1638.
8. Y. Zhao, J. Han, Y. Chen, Y. Su, Y. Cao, B. Wu, S. Yu, M. Li, Z. Wang, M. Zheng, M. Zhuo and Liang-Sheng Liao, *ACS Nano*, 2022, 16, 9, 15000-15007.
9. Q. Wu, Y. Zhu, X. Fang, X. Hao, L. Jiao, E. Hao and W. Zhang, *ACS Appl. Mater. Interfaces*, 2020, 12, 42, 47208-47219.
10. S. Zeng, H. Gao, C. Li, S. Xing, Z. Xu, Q. Liu, G. Feng and Dan Ding, *Adv. Healthcare Mater.* 2021, 10, 2101063.
11. J. Sun, E. Zhao, J. Liang, H. Li, S. Zhao, G. Wang, X. Gu and Ben Zhong Tang, *Adv. Mater.*, 2022, 34, 2108048.
12. Z. Jiang, C. Zhang, X. Wang, M. Yan, Z. Ling, Y. Chen and Z. Liu, *Angew. Chem. Int. Ed.*, 2021, 60, 22376.
